# Supplementary material for: Inhibition of Nigral Microglial Activation Reduces Age-Related Loss of Dopaminergic Neurons and Motor Deficits
Source: MDPI journal article supplement (doi:10.3390/cells11030481), 2022-01-30
Supplement: s1 [file s1]

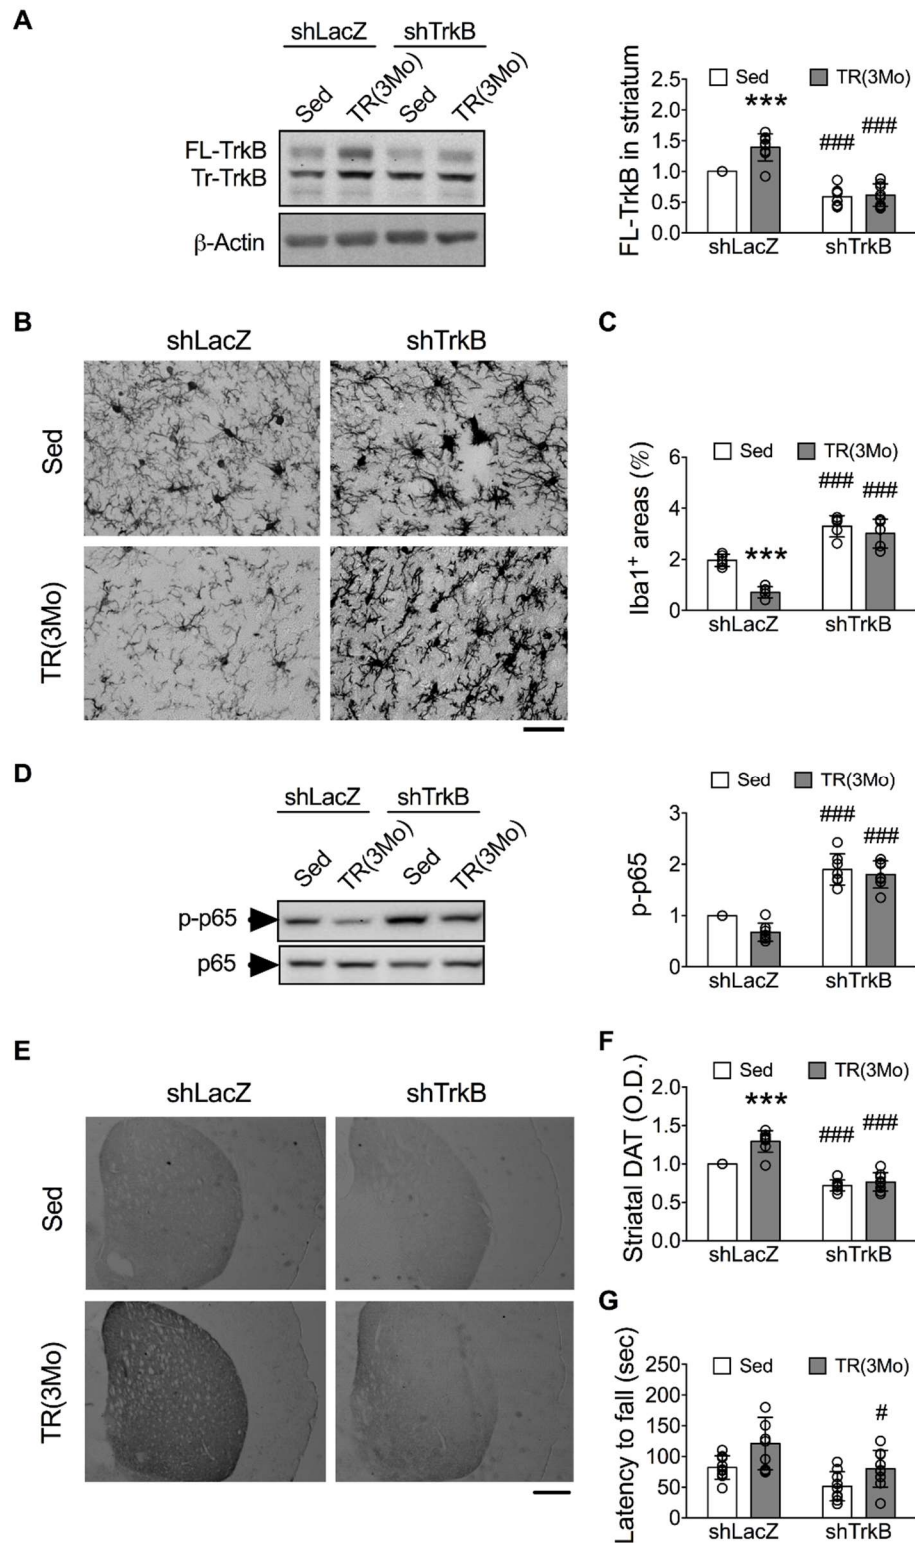

**Figure S1.** Downregulation of TrkB with short hairpin (sh)TrkB blocked the treadmill running (TR)-induced inhibition of age-related microglial activation and DAT reduction in the striatum and motor deficit of middle-aged mice. Mice that underwent 3 months of TR [TR(3Mo)] and three intrastriatal injections of shLacZ or shTrkB viruses. (A) Levels of full-length (FL)-TrkB. (B) Representative micrographs in the striata Bar = 20  $\mu$ m. (C) Quantitative results of Iba1<sup>+</sup> signals area. (D) Levels of p-p65 in the striata. (E) Representative micrographs of DAT<sup>+</sup> signals in the striata. (F) Quantitative results of DAT<sup>+</sup> signals. (G) Latency to fall off the rotarod. \*\*\*  $p < 0.001$  versus respective Sed group; #  $p < 0.05$ , ###  $p < 0.001$  versus respective shLacZ group, two-way ANOVA, Bonferroni's post hoc test. Full-length blots are presented in Figure S2.

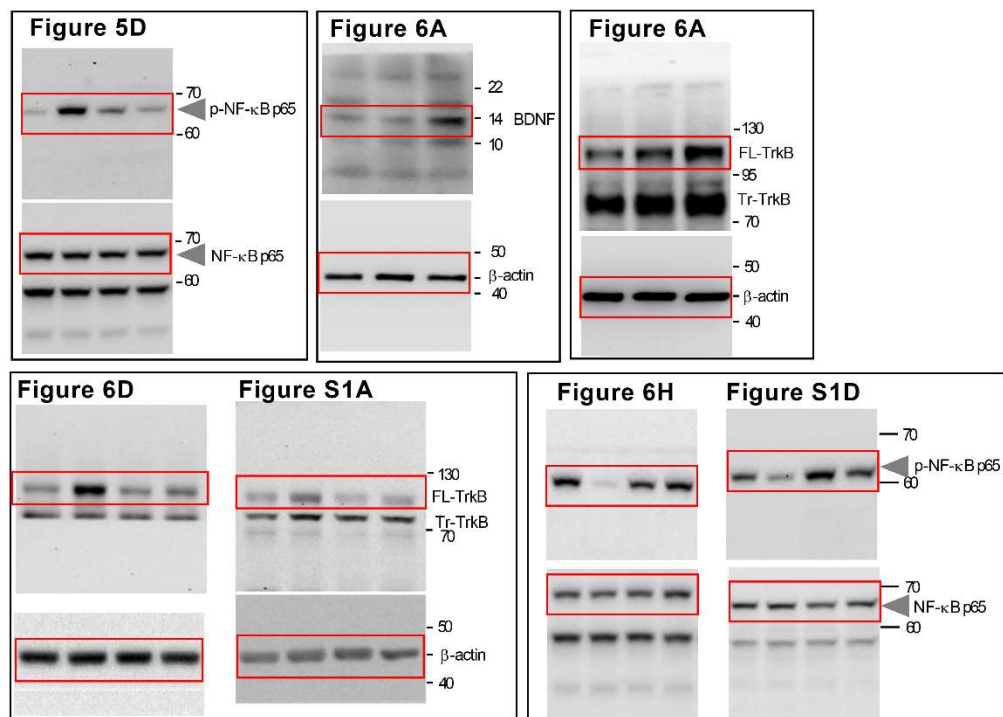

**Figure S2.** Full-length blots cropped for representative figures.

| Table S1. Sample size       |                     |    |
|-----------------------------|---------------------|----|
| Panel                       | Groups              | n  |
| Figure 1B, C, D, F          | 3-month-old mice    | 6  |
|                             | 6-month-old mice    | 6  |
|                             | 9-month-old mice    | 5  |
|                             | 12-month-old mice   | 5  |
| Figure 1G, H                | 6-month-old mice    | 8  |
|                             | 9-month-old mice    | 8  |
|                             | 12-month-old mice   | 8  |
| Figure 1I                   | 6-month-old mice    | 10 |
|                             | 9-month-old mice    | 10 |
|                             | 12-month-old mice   | 10 |
| Figure 2G, H                | Pearson correlation | 22 |
| Figure 3B, C, G, H          | 9 Mo                | 11 |
|                             | Ctl                 | 11 |
|                             | Ibu                 | 11 |
| Figure 3D                   | 9 Mo                | 8  |
|                             | Ctl                 | 8  |
|                             | Ibu                 | 8  |
| Figure 3E                   | 9 Mo                | 5  |
|                             | Ctl                 | 5  |
|                             | Ibu                 | 5  |
| Figure 4C , D, F            | Saline              | 6  |
|                             | Ki20227             | 6  |
| Figure 5B, C, H, J          | 9 Mo                | 11 |
|                             | Sed                 | 11 |
|                             | TR(1Mo)             | 11 |
|                             | TR(3Mo)             | 11 |
| Figure 5D, E, F, K, L , M   | 9 Mo                | 8  |
|                             | Sed                 | 8  |
|                             | TR(1Mo)             | 8  |
|                             | TR(3Mo)             | 8  |
| Figure 6B, C                | Sed                 | 8  |
|                             | TR(1Mo)             | 8  |
|                             | TR(3Mo)             | 8  |
| Figure 6D, F,G, J, S1A, S1F | Sed-shLacZ          | 8  |
|                             | TR-shLacZ           | 8  |
|                             | Sed-shTrkB          | 8  |
|                             | TR-shTrkB           | 8  |
| Figure 6H, S1D              | Sed-shLacZ          | 7  |
|                             | TR-shLacZ           | 7  |
|                             | Sed-shTrkB          | 7  |
|                             | TR-shTrkB           | 7  |
| Figure S1C                  | Sed-shLacZ          | 5  |
|                             | TR-shLacZ           | 5  |
|                             | Sed-shTrkB          | 5  |
|                             | TR-shTrkB           | 5  |
| Figure S1G                  | Sed-shLacZ          | 9  |
|                             | TR-shLacZ           | 9  |
|                             | Sed-shTrkB          | 9  |
|                             | TR-shTrkB           | 9  |

| Table S2. Details of statistics results  |                                        |                                                                               |
|------------------------------------------|----------------------------------------|-------------------------------------------------------------------------------|
| Statistics Methods and Results (part 1.) |                                        |                                                                               |
| Panel                                    | Statistics methods                     | Statistics Results                                                            |
| Figure 1B                                | one-way ANOVA                          | $F = 7.96$ , degree of freedom (d.f.) 3/18, $p = 0.001$                       |
|                                          | Bonferroni's multiple comparisons test | 3 Mo vs. 6 Mo: n.s.; 3 Mo vs. 9 Mo: n.s.; 3 Mo vs. 12 Mo: $p = 0.006$         |
| Figure 1C                                | one-way ANOVA                          | $F = 19.53$ , d.f. 3/18, $p < 0.001$                                          |
|                                          | Bonferroni's multiple comparisons test | 3 Mo vs. 6 Mo: n.s.; 3 Mo vs. 9 Mo: n.s.; 3 Mo vs. 12 Mo: $p < 0.001$         |
| Figure 1D                                | one-way ANOVA                          | $F = 10.24$ , d.f. 3/18, $p < 0.001$                                          |
|                                          | Bonferroni's multiple comparisons test | 3 Mo vs. 6 Mo: n.s.; 3 Mo vs. 9 Mo: $p = 0.009$ ; 3 Mo vs. 12 Mo: $p < 0.001$ |
| Figure 1F                                | one-way ANOVA                          | $F = 9.20$ , d.f. 3/18, $p < 0.001$                                           |
|                                          | Bonferroni's multiple comparisons test | 3 Mo vs. 6 Mo: n.s.; 3 Mo vs. 9 Mo: $p = 0.009$ ; 3 Mo vs. 12 Mo: $p < 0.001$ |
| Figure 1G                                | one-way ANOVA                          | $F = 12.15$ , d.f. 2/21, $p < 0.001$                                          |
|                                          | Bonferroni's multiple comparisons test | 6 Mo vs. 9 Mo: $p = 0.006$ ; 6 Mo vs. 12 Mo: $p < 0.001$                      |
| Figure 1H                                | one-way ANOVA                          | $F = 31.53$ , d.f. 2/21, $p < 0.001$                                          |
|                                          | Bonferroni's multiple comparisons test | 6 Mo vs. 9 Mo: $p < 0.001$ ; 6 Mo vs. 12 Mo: $p < 0.001$                      |
| Figure 1I                                | one-way ANOVA                          | $F = 96.38$ , d.f. 2/27, $p < 0.001$                                          |
|                                          | Bonferroni's multiple comparisons test | 6 Mo vs. 9 Mo: $p = 0.025$ ; 6 Mo vs. 12 Mo: $p < 0.001$                      |
| Figure 2G                                | Pearson correlation                    | TH neuron number v.s. Iba1 areas, $r = -0.66$ , $p < 0.007$                   |
| Figure 2H                                | Pearson correlation                    | TH neuron number v.s. Iba1 cell numbers, $r = -0.59$ , $p = 0.004$            |
| Figure 3B                                | unpaired two-tailed Student's $t$ test | $t = 5.49$ , d.f. = 20, $p < 0.001$                                           |
| Figure 3C                                | unpaired two-tailed Student's $t$ test | $t = 4.26$ , d.f. = 20, $p < 0.001$                                           |
| Figure 3D                                | unpaired two-tailed Student's $t$ test | $t = 6.31$ , d.f. = 14, $p < 0.001$                                           |
| Figure 3E                                | unpaired two-tailed Student's $t$ test | $t = 2.43$ , d.f. = 8, $p = 0.041$                                            |
| Figure 3G                                | unpaired two-tailed Student's $t$ test | $t = 5.70$ , d.f. = 20, $p < 0.001$                                           |
| Figure 3H                                | unpaired two-tailed Student's $t$ test | $t = 2.98$ , d.f. = 20, $p = 0.007$                                           |
| Figure 4C                                | paired two-tailed Student's $t$ test   | $t = 4.14$ , d.f. = 5, $p = 0.009$                                            |
| Figure 4D                                | paired two-tailed Student's $t$ test   | $t = 5.01$ , d.f. = 5, $p = 0.004$                                            |
| Figure 4F                                | paired two-tailed Student's $t$ test   | $t = 3.18$ , d.f. = 5, $p = 0.025$                                            |
| Figure 5B                                | one-way ANOVA                          | $F = 32.87$ , d.f. 2/30, $p < 0.001$                                          |
|                                          | Bonferroni's multiple comparisons test | Sed vs. TR(1Mo): n.s.; Sed vs. TR(3Mo): $p < 0.001$                           |
| Figure 5C                                | one-way ANOVA                          | $F = 41.68$ , d.f. 2/30, $p < 0.001$                                          |
|                                          | Bonferroni's multiple comparisons test | Sed vs. TR(1Mo): n.s.; Sed vs. TR(3Mo): $p < 0.001$                           |
| Figure 5D                                | one-way ANOVA                          | $F = 7.48$ , d.f. 2/21, $p = 0.004$                                           |
|                                          | Bonferroni's multiple comparisons test | Sed vs. TR(1Mo): n.s.; Sed vs. TR(3Mo): $p = 0.003$                           |
| Figure 5E                                | one-way ANOVA                          | $F = 12.12$ , d.f. 2/21, $p < 0.001$                                          |
|                                          | Bonferroni's multiple comparisons test | Sed vs. TR(1Mo): n.s.; Sed vs. TR(3Mo): $p < 0.001$                           |
| Figure 5F                                | one-way ANOVA                          | $F = 3.47$ , d.f. 2/21, $p = 0.050$                                           |
|                                          | Bonferroni's multiple comparisons test | Sed vs. TR(1Mo): n.s.; Sed vs. TR(3Mo): $p = 0.032$                           |

| Statistics Methods and Results (part 2.) |                                        |                                                                                                                                                                               |
|------------------------------------------|----------------------------------------|-------------------------------------------------------------------------------------------------------------------------------------------------------------------------------|
| Panel                                    | Statistics methods                     | Statistics Results                                                                                                                                                            |
| Figure 5H                                | one-way ANOVA                          | $F = 52.39, d.f. 2/30, p < 0.001$                                                                                                                                             |
|                                          | Bonferroni's multiple comparisons test | Sed vs. TR(1Mo): n.s.; Sed vs. TR(3Mo): $p < 0.001$                                                                                                                           |
| Figure 5J                                | one-way ANOVA                          | $F = 24.13, d.f. 2/30, p < 0.001$                                                                                                                                             |
|                                          | Bonferroni's multiple comparisons test | Sed vs. TR(1Mo): $p = 0.004$ ; Sed vs. TR(3Mo): $p < 0.001$                                                                                                                   |
| Figure 5K                                | one-way ANOVA                          | $F = 25.66, d.f. 2/21, p < 0.001$                                                                                                                                             |
|                                          | Bonferroni's multiple comparisons test | Sed vs. TR(1Mo): $p < 0.001$ ; Sed vs. TR(3Mo): $p < 0.001$                                                                                                                   |
| Figure 5L                                | one-way ANOVA                          | $F = 5.06, d.f. 2/21, p = 0.016$                                                                                                                                              |
|                                          | Bonferroni's multiple comparisons test | Sed vs. TR(1Mo): n.s.; Sed vs. TR(3Mo): $p = 0.017$                                                                                                                           |
| Figure 5M                                | one-way ANOVA                          | $F = 12.52, d.f. 2/21, p < 0.001$                                                                                                                                             |
|                                          | Bonferroni's multiple comparisons test | Sed vs. TR(1Mo): n.s.; Sed vs. TR(3Mo): $p < 0.001$                                                                                                                           |
| Figure 6B                                | one-way ANOVA                          | $F = 8.70, d.f. 2/21, p = 0.002$                                                                                                                                              |
|                                          | Bonferroni's multiple comparisons test | Sed vs. TR(1Mo): n.s.; Sed vs. TR(3Mo): $p = 0.002$                                                                                                                           |
| Figure 6C                                | one-way ANOVA                          | $F = 11.65, d.f. 2/21, p < 0.001$                                                                                                                                             |
|                                          | Bonferroni's multiple comparisons test | Sed vs. TR(1Mo): $p = 0.036$ ; Sed vs. TR(3Mo): $p < 0.001$                                                                                                                   |
| Figure 6D                                | ordinary two-way ANOVA                 | interaction: $F(1, 28) = 3.03, p = 0.093$<br>shLacZ vs. shTrkB: $F(1, 28) = 52.59, p < 0.001$<br>Sed vs. TR: $F(1, 28) = 18.83, p < 0.001$                                    |
|                                          | Bonferroni's multiple comparisons test | shLacZ-TR(3Mo) vs. shLacZ-Sed: $p = 0.001$ ; shTrkB-Sed vs. shLacZ-Sed: $p = 0.003$ ;<br>shTrkB-TR(3Mo) vs. shLacZ-TR(3Mo): $p < 0.001$ ; shTrkB-Sed vs. shTrkB-TR(3Mo): n.s. |
| Figure 6F                                | ordinary two-way ANOVA                 | interaction: $F(1, 28) = 7.55, p = 0.010$<br>shLacZ vs. shTrkB: $F(1, 28) = 46.84, p < 0.001$<br>Sed vs. TR: $F(1, 28) = 31.22, p < 0.001$                                    |
|                                          | Bonferroni's multiple comparisons test | shLacZ-TR(3Mo) vs. shLacZ-Sed: $p < 0.001$ ; shTrkB-Sed vs. shLacZ-Sed: $p = 0.044$ ;<br>shTrkB-TR(3Mo) vs. shLacZ-TR(3Mo): $p < 0.001$ ; shTrkB-Sed vs. shTrkB-TR(3Mo): n.s. |
| Figure 6G                                | ordinary two-way ANOVA                 | interaction: $F(1, 28) = 7.02, p = 0.013$<br>shLacZ vs. shTrkB: $F(1, 28) = 35.27, p < 0.001$<br>Sed vs. TR: $F(1, 28) = 14.29, p < 0.001$                                    |
|                                          | Bonferroni's multiple comparisons test | shLacZ-TR(3Mo) vs. shLacZ-Sed: $p < 0.001$ ; shTrkB-Sed vs. shLacZ-Sed: n.s.; shTrkB-TR(3Mo) vs. shLacZ-TR(3Mo): $p < 0.001$ ; shTrkB-Sed vs. shTrkB-TR(3Mo): n.s.            |
| Figure 6H                                | ordinary two-way ANOVA                 | interaction: $F(1, 24) = 8.82, p = 0.007$<br>shLacZ vs. shTrkB: $F(1, 24) = 35.61, p < 0.001$<br>Sed vs. TR: $F(1, 24) = 18.00, p < 0.001$                                    |
|                                          | Bonferroni's multiple comparisons test | shLacZ-TR(3Mo) vs. shLacZ-Sed: $p < 0.001$ ; shTrkB-Sed vs. shLacZ-Sed: n.s.; shTrkB-TR(3Mo) vs. shLacZ-TR(3Mo): $p < 0.001$ ; shTrkB-Sed vs. shTrkB-TR(3Mo): n.s.            |
| Figure 6J                                | ordinary two-way ANOVA                 | interaction: $F(1, 28) = 8.08, p = 0.008$<br>shLacZ vs. shTrkB: $F(1, 28) = 45.62, p < 0.001$<br>Sed vs. TR: $F(1, 28) = 23.47, p < 0.001$                                    |
|                                          | Bonferroni's multiple comparisons test | shLacZ-Sed vs. shLacZ-TR(3Mo): $p < 0.001$ ; shLacZ-Sed vs. shTrkB-Sed: n.s.; shLacZ-TR(3Mo) vs. shTrkB-TR(3Mo): $p < 0.001$ ; shTrkB-Sed vs. shTrkB-TR(3Mo): n.s.            |

| Statistics Methods and Results (part 3.) |                                        |                                                                                                                                                                                |
|------------------------------------------|----------------------------------------|--------------------------------------------------------------------------------------------------------------------------------------------------------------------------------|
| Panel                                    | Statistics methods                     | Statistics Results                                                                                                                                                             |
| Figure S1A                               | ordinary two-way ANOVA                 | interaction: $F(1, 28) = 9.96, p = 0.004$<br>shLacZ vs. shTrkB: $F(1, 28) = 106.82, p < 0.001$<br>Sed vs. TR: $F(1, 28) = 13.36, p = 0.001$                                    |
|                                          | Bonferroni's multiple comparisons test | shLacZ-TR(3Mo) vs. shLacZ-Sed: $p < 0.001$ ; shTrkB-Sed vs. shLacZ-Sed: $p < 0.001$ ;<br>shTrkB-TR(3Mo) vs. shLacZ-TR(3Mo): $p < 0.001$ ; shTrkB-Sed vs. shTrkB-TR(3Mo): n.s.  |
| Figure S1C                               | ordinary two-way ANOVA                 | interaction: $F(1, 16) = 7.88, p = 0.013$<br>shLacZ vs. shTrkB: $F(1, 16) = 110.37, p < 0.001$<br>Sed vs. TR: $F(1, 16) = 19.81, p < 0.001$                                    |
|                                          | Bonferroni's multiple comparisons test | shLacZ-TR(3Mo) vs. shLacZ-Sed: $p < 0.001$ ; shTrkB-Sed vs. shLacZ-Sed: $p < 0.001$ ;<br>shTrkB-TR(3Mo) vs. shLacZ-TR(3Mo): $p < 0.001$ ; shTrkB-Sed vs. shTrkB-TR(3Mo): n.s.  |
| Figure S1D                               | ordinary two-way ANOVA                 | interaction: $F(1, 24) = 1.88, p = 0.183$<br>shLacZ vs. shTrkB: $F(1, 24) = 148.40, p < 0.001$<br>Sed vs. TR: $F(1, 24) = 6.54, p = 0.017$                                     |
|                                          | Bonferroni's multiple comparisons test | shLacZ-Sed vs. shLacZ-TR(3Mo): $p = 0.0626$ ; shLacZ-Sed vs. shTrkB-Sed: $p < 0.001$ ;<br>shLacZ-TR(3Mo) vs. shTrkB-TR(3Mo): $p < 0.001$ ; shTrkB-Sed vs. shTrkB-TR(3Mo): n.s. |
| Figure S1F                               | ordinary two-way ANOVA                 | interaction: $F(1, 28) = 12.60, p = 0.001$<br>shLacZ vs. shTrkB: $F(1, 28) = 134.07, p < 0.001$<br>Sed vs. TR: $F(1, 28) = 23.42, p < 0.001$                                   |
|                                          | Bonferroni's multiple comparisons test | shLacZ-TR(3Mo) vs. shLacZ-Sed: $p < 0.001$ ; shTrkB-Sed vs. shLacZ-Sed: $p < 0.001$ ;<br>shTrkB-TR(3Mo) vs. shLacZ-TR(3Mo): $p < 0.001$ ; shTrkB-TR(3Mo) vs. shTrkB-Sed: n.s.  |
| Figure S1G                               | ordinary two-way ANOVA                 | interaction: $F(1, 32) = 0.27, p = 0.605$<br>shLacZ vs. shTrkB: $F(1, 32) = 12.65, p = 0.001$<br>Sed vs. TR: $F(1, 32) = 11.34, p = 0.002$                                     |
|                                          | Bonferroni's multiple comparisons test | shLacZ-TR(3Mo) vs. shLacZ-Sed: n.s.; shTrkB-Sed vs. shLacZ-Sed: n.s.; shTrkB-TR(3Mo)<br>vs. shLacZ-TR(3Mo): $p = 0.042$ ; shTrkB-TR(3Mo) vs. shTrkB-Sed: n.s.                  |
